# Supplementary figures and images for: Formation of colloidal chains and driven clusters with optical binding
Source: Royal Society of Chemistry journal article supplement (doi:10.1039/d2sm00393g), 2022-01-01

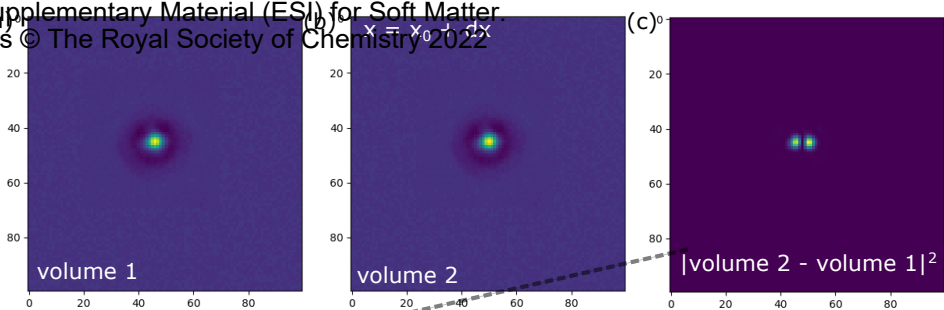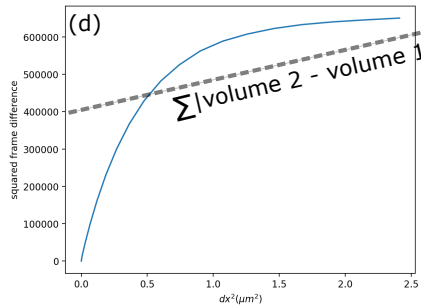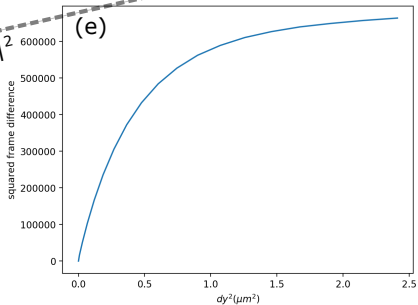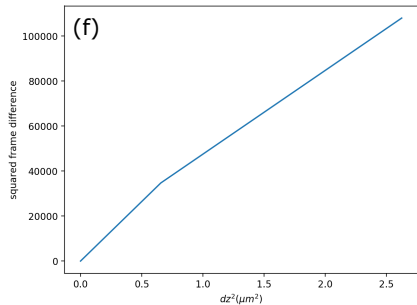

Supplement: d2sm00393g5.pdf [file d2sm00393g5.pdf]

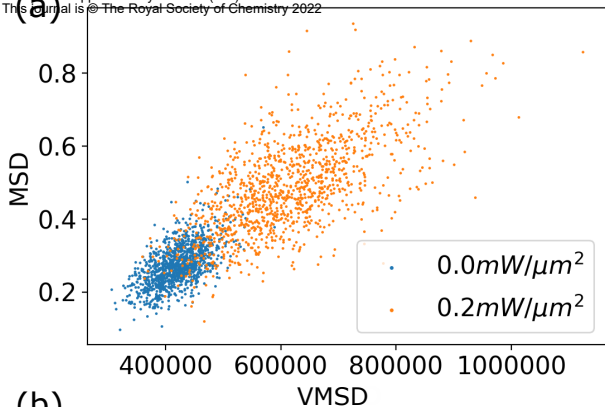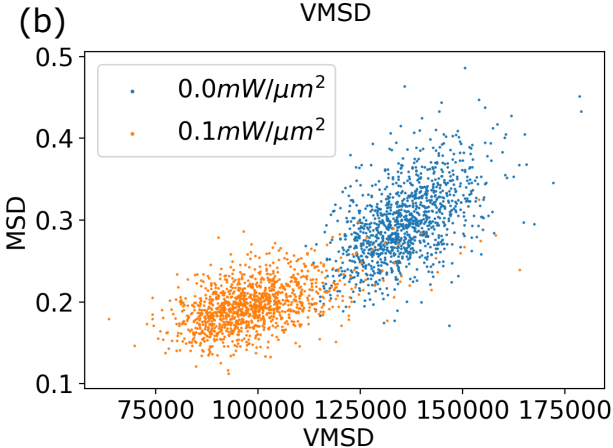

Supplement: d2sm00393g6.pdf [file d2sm00393g6.pdf]
